# Supplementary figures and images for: Improved precision and accuracy for microarrays using updated probe set definitions
Source: Springer Nature journal article supplement (doi:10.1186/1471-2105-8-48), 2007-02-08

A

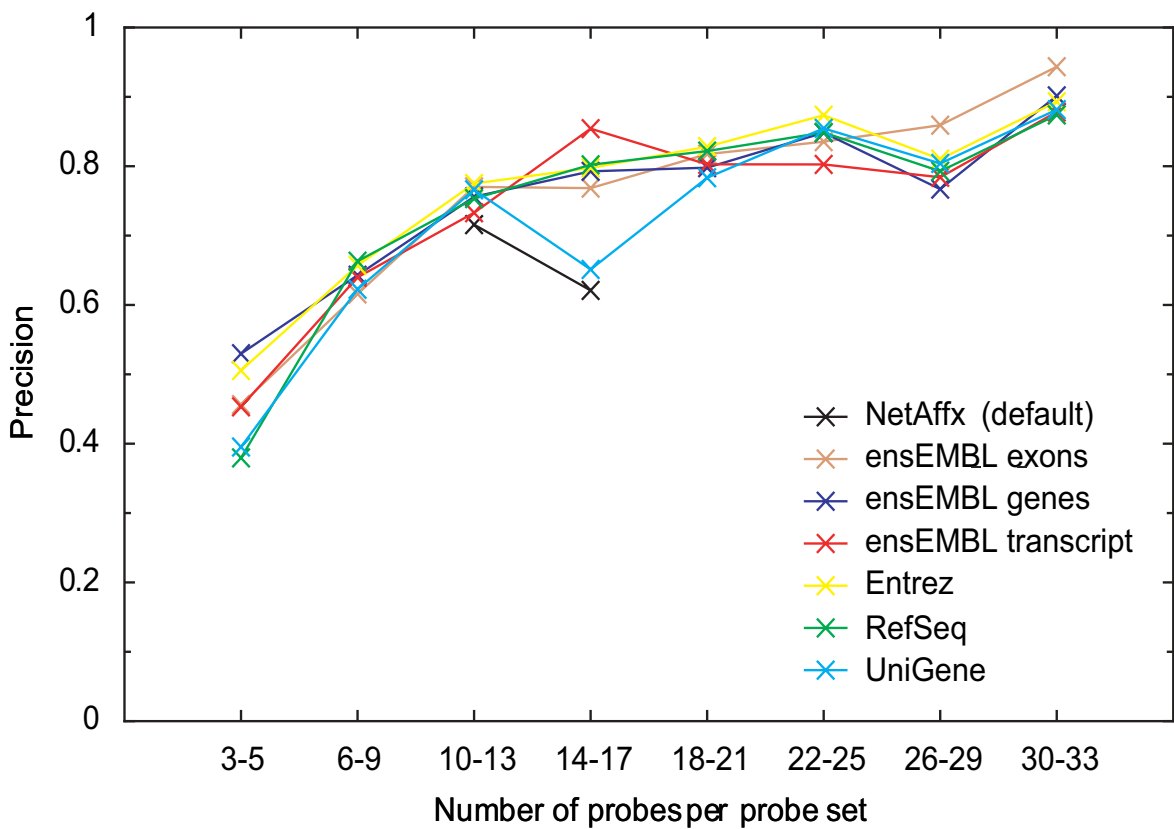

B

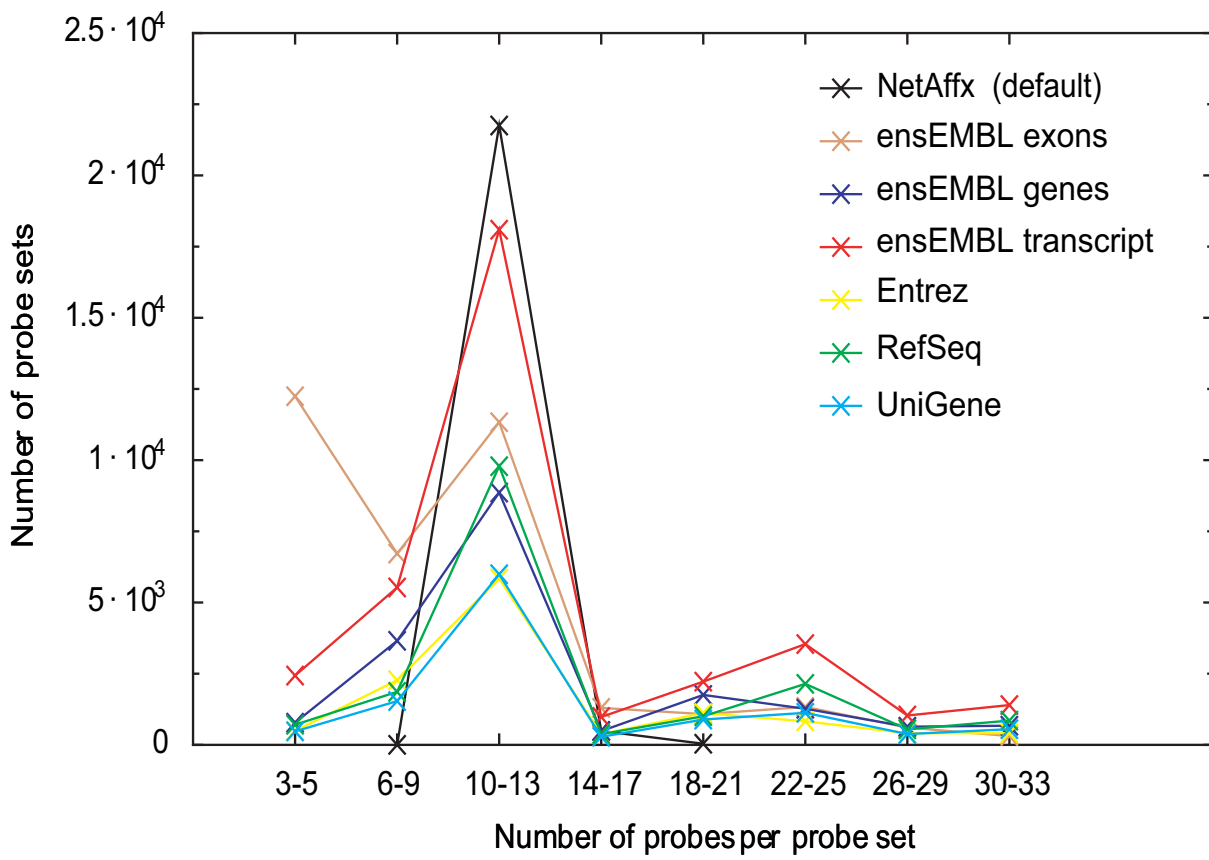

Supplement: 12859_2006_1420_MOESM4_ESM.pdf [file 12859_2006_1420_MOESM4_ESM.pdf]
